# Supplementary material for: NH2-Functionalized Magnetic Nanoparticles for the N-Glycomic Analysis of Patients with Multiple Sclerosis
Source: MDPI journal article supplement (doi:10.3390/ijms23169095), 2022-08-13
Supplement: s1 [file s1]

# Supplementary Material of the manuscript entitled NH<sub>2</sub>-Functionalized Magnetic Nanoparticles for The N-glycomic Analysis of Patients with Multiple Sclerosis

Dalma Dojcsák <sup>1</sup>, Ágnes Ilosvai <sup>2</sup>, László Vanyorek <sup>2</sup>, Ibolya Gilányi <sup>3</sup>, Csaba Oláh <sup>3</sup>, László Horváth <sup>3</sup> and Csaba Váradi <sup>1, \*</sup>

<sup>1</sup> Advanced Materials and Intelligent Technologies Higher Education and Industrial Cooperation Centre, University of Miskolc, Hungary 3515;

<sup>2</sup> Institute of Chemistry, Faculty of Materials Science and Engineering, University of Miskolc, Hungary 3515;

<sup>3</sup> Borsod-Abaúj-Zemplén County Center Hospital and University Teaching Hospital, Miskolc, Hungary 3526

\* Correspondence: kemcsv@uni-miskolc.hu; Tel.: +36308947730

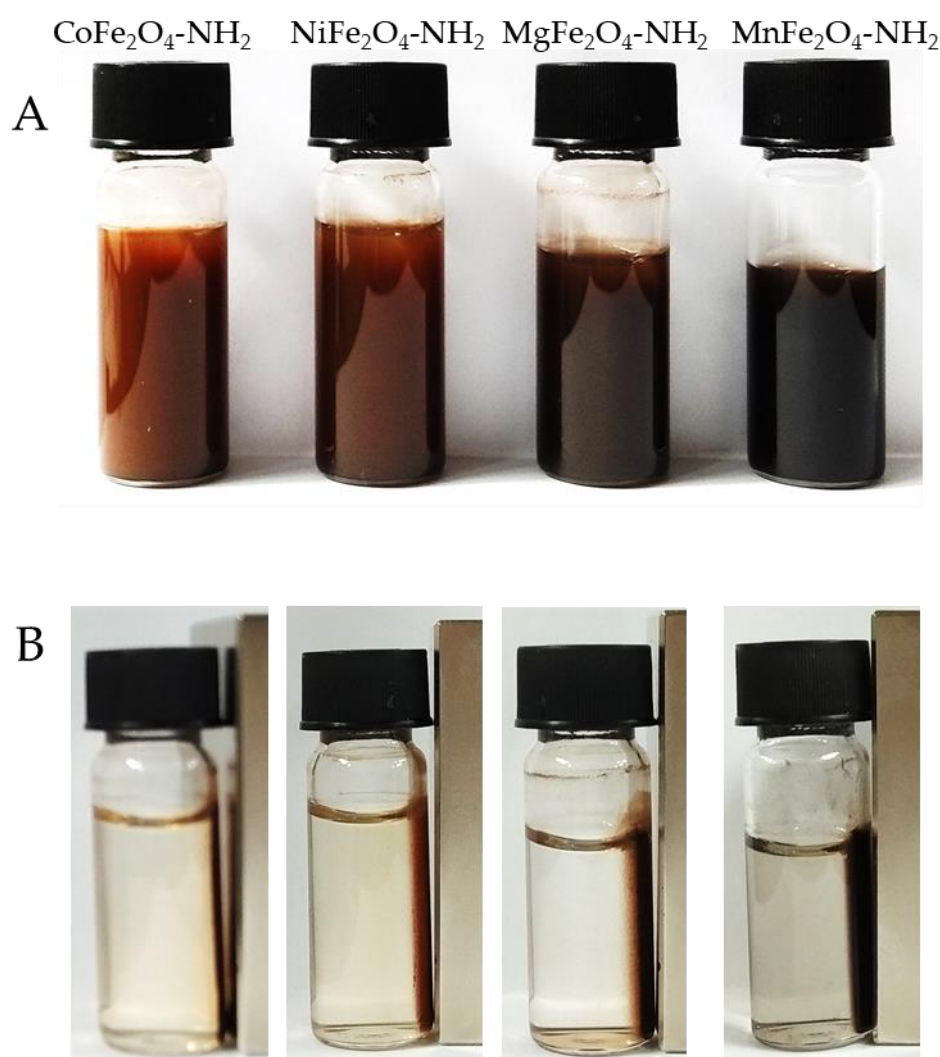

**Supplementary Figure S1.** Dispersibility (A) and the well separability of the ferrite nanoparticles by magnetic field (B).

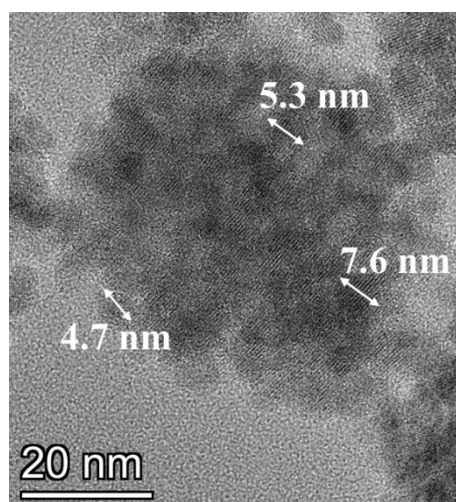

**Supplementary Figure S2.** HRTEM picture MnFe<sub>2</sub>O<sub>4</sub> nanosphere and the forming nanoparticles.

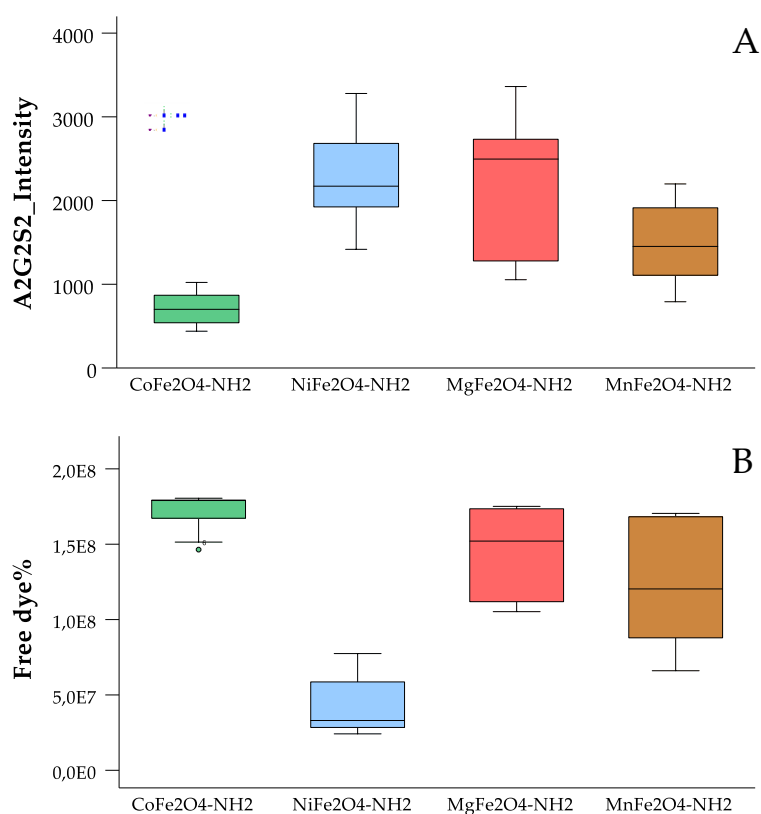

**Supplementary Figure S3.** Signal intensity of purified glycan structure (**A**) and free procainamide (**B**) and using different NH<sub>2</sub>-Functionalized Magnetic Nanoparticle.

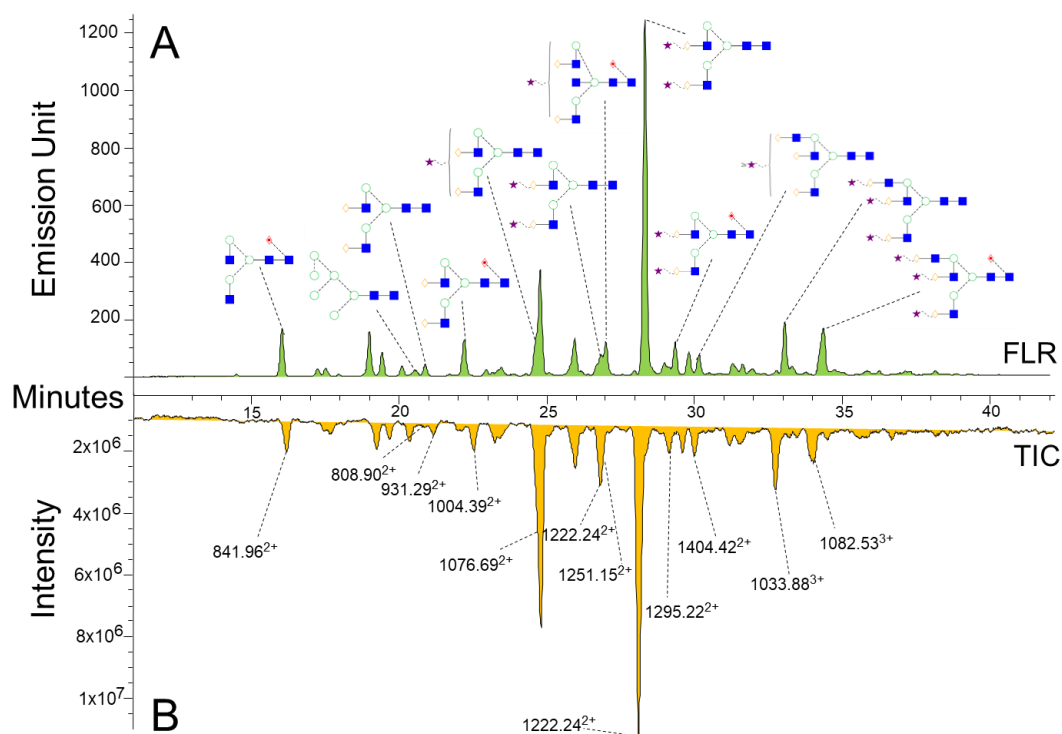

**Supplementary Figure S4.** Profile of human serum N-glycome analyzed by hydrophilic interaction liquid chromatography with fluorescence (A) and mass-spectrometric detection (B).

**Supplementary Table S1.** Calculation of variation coefficient throughout the quantified 43 peaks of HILIC chromatograms.

|         | Mean | Standard deviation | CV    |
|---------|------|--------------------|-------|
| Peak 1  | 3.18 | 0.07               | 2.14  |
| Peak 2  | 0.81 | 0.03               | 4.04  |
| Peak 3  | 0.84 | 0.02               | 2.38  |
| Peak 4  | 4.02 | 0.07               | 1.71  |
| Peak 5  | 2.26 | 0.04               | 1.93  |
| Peak 6  | 1.20 | 0.02               | 1.84  |
| Peak 7  | 0.23 | 0.02               | 10.00 |
| Peak 8  | 1.07 | 0.06               | 5.16  |
| Peak 9  | 1.06 | 0.03               | 2.91  |
| Peak 10 | 4.11 | 0.05               | 1.17  |
| Peak 11 | 1.06 | 0.01               | 1.29  |
| Peak 12 | 1.33 | 0.01               | 0.81  |
| Peak 13 | 2.74 | 0.05               | 1.86  |
| Peak 14 | 8.47 | 0.05               | 0.60  |
| Peak 15 | 1.75 | 0.22               | 12.82 |
| Peak 16 | 3.87 | 0.19               | 4.88  |
| Peak 17 | 0.55 | 0.01               | 1.95  |

|         |       |      |       |
|---------|-------|------|-------|
| Peak 18 | 1.46  | 0.07 | 4.88  |
| Peak 19 | 3.86  | 0.07 | 1.72  |
| Peak 20 | 0.38  | 0.00 | 0.53  |
| Peak 21 | 28.07 | 0.20 | 0.71  |
| Peak 22 | 0.36  | 0.04 | 12.39 |
| Peak 23 | 1.20  | 0.06 | 5.12  |
| Peak 24 | 3.91  | 0.07 | 1.83  |
| Peak 25 | 1.72  | 0.01 | 0.72  |
| Peak 26 | 1.99  | 0.01 | 0.69  |
| Peak 27 | 1.20  | 0.03 | 2.70  |
| Peak 28 | 0.54  | 0.03 | 5.76  |
| Peak 29 | 0.56  | 0.00 | 0.72  |
| Peak 30 | 0.80  | 0.01 | 0.92  |
| Peak 31 | 0.18  | 0.03 | 14.04 |
| Peak 32 | 5.93  | 0.11 | 1.78  |
| Peak 33 | 0.83  | 0.01 | 1.68  |
| Peak 34 | 0.59  | 0.02 | 2.96  |
| Peak 35 | 1.84  | 0.05 | 2.70  |
| Peak 36 | 2.21  | 0.04 | 1.93  |
| Peak 37 | 1.16  | 0.02 | 1.88  |
| Peak 38 | 0.61  | 0.01 | 1.56  |
| Peak 39 | 0.61  | 0.02 | 3.84  |
| Peak 40 | 0.16  | 0.01 | 7.80  |
| Peak 41 | 0.61  | 0.03 | 5.60  |
| Peak 42 | 0.29  | 0.01 | 3.94  |
| Peak 43 | 0.37  | 0.02 | 5.50  |
| Mean    |       | 0.05 | 3.52  |

**Supplementary Table S2.** Significant N-glycome alterations between multiple sclerosis patients and healthy controls.

|                       |                  |            | Healthy_Female        |                   | Healthy_Male          |                   | Sclerosis_Female      |                   | Sclerosis_Male        |                   |                                     |
|-----------------------|------------------|------------|-----------------------|-------------------|-----------------------|-------------------|-----------------------|-------------------|-----------------------|-------------------|-------------------------------------|
| <i>Retention time</i> | <i>Structure</i> | <i>m/z</i> | <i>Area % average</i> | <i>Area % std</i> | <i>Significance level (p-value)</i> |
| 16.07                 | FA2              | 842.11     | 3.41                  | 1.13              | 3.88                  | 1.26              | 2.83                  | 0.98              | 3.67                  | 1.40              | 0.04                                |
| 17.29                 | M5               | 727.93     | 1.00                  | 0.26              | 0.97                  | 0.20              | 1.15                  | 0.33              | 0.87                  | 0.16              | 0.04                                |
| 20.64                 | M6               | 809.09     | 0.98                  | 0.30              | 0.93                  | 0.20              | 1.22                  | 0.39              | 0.89                  | 0.24              | 0.02                                |
| 20.94                 | A2G2             | 931.18     | 0.96                  | 0.14              | 0.91                  | 0.14              | 1.12                  | 0.13              | 1.02                  | 0.08              | 0.01                                |
| 22.98                 | FA2BG2           | 1105.83    | 0.76                  | 0.18              | 0.71                  | 0.18              | 1.10                  | 0.24              | 0.76                  | 0.18              | 0.01                                |
| 23.43                 | FA2BFG1          | 1097.40    | 1.10                  | 0.19              | 1.16                  | 0.16              | 0.91                  | 0.18              | 1.00                  | 0.25              | 0.01                                |
| 24.57                 | A2G2S1           | 1076.77    | 2.78                  | 0.24              | 2.77                  | 0.32              | 3.21                  | 0.44              | 3.09                  | 0.66              | 0.01                                |
| 25.89                 | FA2G2S1          | 1149.74    | 3.49                  | 0.81              | 3.46                  | 0.65              | 2.95                  | 0.69              | 3.00                  | 0.98              | 0.05                                |
| 26.78                 | A2G2S2           | 1222.53    | 2.66                  | 0.90              | 2.61                  | 0.79              | 1.72                  | 0.41              | 1.82                  | 0.62              | 0.01                                |
| 26.90                 | FA2BG2S1         | 1251.62    | 3.21                  | 0.72              | 2.85                  | 0.58              | 4.07                  | 0.96              | 3.42                  | 0.58              | 0.01                                |
| 28.45                 | A2G2S2           | 1221.94    | 0.56                  | 0.08              | 0.65                  | 0.25              | 0.39                  | 0.10              | 0.46                  | 0.05              | 0.01                                |
| 28.98                 | FA2G2S2          | 1295.36    | 1.50                  | 0.22              | 1.58                  | 0.19              | 1.30                  | 0.55              | 1.56                  | 0.46              | 0.03                                |
| 31.26                 | A3G3S2           | 1404.98    | 0.52                  | 0.15              | 0.47                  | 0.08              | 0.54                  | 0.11              | 0.42                  | 0.11              | 0.03                                |
| 31.52                 | FA3G3S2          | 1477.90    | 0.57                  | 0.23              | 0.66                  | 0.22              | 0.76                  | 0.36              | 0.86                  | 0.33              | 0.04                                |
| 34.59                 | A4G4S3           | 1155.80    | 0.83                  | 0.14              | 0.83                  | 0.24              | 1.01                  | 0.19              | 0.94                  | 0.35              | 0.01                                |
